# Supplementary material for: Fabrication of a surface molecularly imprinted polymer membrane based on a single template and its application in the separation and extraction of phenytoin, phenobarbital and lamotrigine
Source: Royal Society of Chemistry journal article supplement (doi:10.1039/d4ra00294f), 2024-01-01
Supplement: d4ra00294f1.pdf [file d4ra00294f1.pdf]

## SUPPLEMENTARY MATERIALS

### *HPLC conditions for determination of PHT in the optimization of MIPMs preparation*

HPLC analysis was conducted on an Agilent 1290 UHPLC system containing an online degasser, two solvent delivery pumps, an auto-sampler, a column temperature controller and a diode array detector (Agilent Technologies, Wilmington, DE, USA). Sample was separation on an Agilent Zorbax SB-C18 column (150 mm × 4.6 mm, 5 μm) maintained at 35 °C. The mobile phase was consisted of methanol and water (70:30, v/v) at the flow of 1.0 mL/min. The auto-sampler temperature was set at 4°C. The injection volume was 10 μL and the detection wavelength was set at 240 nm.

### *HPLC conditions for determination of OXC, CBZ, MHD, CBZE, LTG and/or PHB in the adsorption performance evaluation of MIPMs*

HPLC analysis was carried out on a Waters Alliance HPLC system consisting of Waters 2695 Separations Module connected to the Waters 2998 PDA Absorbance Detector. Samples separation was performed on an Agilent Zorbax SB-C18 column (150 mm × 4.6 mm, 5 μm) maintained at 35°C. The mobile phase was consisted of methanol and water (60:40, v/v) at the flow of 1.0 mL/min. The auto-sampler temperature was set at 4°C and the injection volume was 10 μL. The detection wavelength was set at 240 nm for PHT, 306 nm for OXC, 285 nm for CBZ, 307 nm for LTG, and 210 nm for PHB and DPG.

Table S1 Experimental parameters in the optimization of template type

| No. | Template (mmol) |      | Functional monomer (mmol) |  | Cross-linking agent (mmol) |      | Initiator (mmol) | Porogen (mL)         |
|-----|-----------------|------|---------------------------|--|----------------------------|------|------------------|----------------------|
|     | PHT             | LTG  | MMA                       |  | EGDMA                      | TRIM | AIBN             | ACN-DMF (1:1.5, v/v) |
| 1   | 0.20            | -    | 6.0                       |  | 4.0                        | -    | 0.10             | 2.5                  |
| 2   | -               | 0.20 | 6.0                       |  | -                          | 4.0  | 0.10             | 2.5                  |

OXC, oxcarbazepine; CBZ, carbamazepine; MMA, methyl methacrylate; EGDMA, ethylene glycol dimethacrylate; TRIM, trimethylolpropane trimethacrylate; AIBN, azobisisobutyronitrile; ACN, acetonitrile; DMF, N,N-dimethylformamide

Table S2 Experimental parameters in the optimization of template amount

| No. | Template (mmol) | Functional monomer (mmol) | Cross-linking agent (mmol) | Initiator (mmol) | Porogen (mL)         |
|-----|-----------------|---------------------------|----------------------------|------------------|----------------------|
|     | PHT             | MMA                       | EGDMA                      | AIBN             | ACN-DMF (1:1.5, v/v) |
| 1   | 0.10            | 6.0                       | 4.0                        | 0.10             | 2.5                  |
| 2   | 0.15            | 6.0                       | 4.0                        | 0.10             | 2.5                  |
| 3   | 0.20            | 6.0                       | 4.0                        | 0.10             | 2.5                  |
| 4   | 0.25            | 6.0                       | 4.0                        | 0.10             | 2.5                  |
| 5   | 0.30            | 6.0                       | 4.0                        | 0.10             | 2.5                  |

Table S3 Experimental parameters in the optimization of functional monomer type

| No. | Template (mmol) |     | Functional monomer (mmol) |      |     |     | Cross-linking agent (mmol) |      | Initiator (mmol)     | Porogen (mL) |
|-----|-----------------|-----|---------------------------|------|-----|-----|----------------------------|------|----------------------|--------------|
|     | PHT             | MAA | VBA                       | MAAm | MMA | AM  | EGDMA                      | AIBN | ACN-DMF (1:1.5, v/v) |              |
| 1   | 0.20            | 6.0 | -                         | -    | -   | -   | 4.0                        | 0.10 | 2.5                  |              |
| 2   | 0.20            | -   | 6.0                       | -    | -   | -   | 4.0                        | 0.10 | 2.5                  |              |
| 3   | 0.20            | -   | -                         | 6.0  | -   | -   | 4.0                        | 0.10 | 2.5                  |              |
| 4   | 0.20            | -   | -                         | -    | 6.0 | -   | 4.0                        | 0.10 | 2.5                  |              |
| 5   | 0.20            | -   | -                         | -    | -   | 6.0 | 4.0                        | 0.10 | 2.5                  |              |

MAA, methacrylic acid; VBA, 4-vinylbenzoic acid; MAAm, methacrylamide; AM, acrylamide

Table S4 Experimental parameters in the optimization of functional monomer amount

| No. | Template (mmol) | Functional monomer (mmol) | Cross-linking agent (mmol) | Initiator (mmol) | Porogen (mL)         |
|-----|-----------------|---------------------------|----------------------------|------------------|----------------------|
|     | PHT             | MMA                       | EGDMA                      | AIBN             | ACN-DMF (1:1.5, v/v) |
| 1   | 0.20            | 4.0                       | 4.0                        | 0.10             | 2.5                  |
| 2   | 0.20            | 5.0                       | 4.0                        | 0.10             | 2.5                  |
| 3   | 0.20            | 6.0                       | 4.0                        | 0.10             | 2.5                  |
| 4   | 0.20            | 7.0                       | 4.0                        | 0.10             | 2.5                  |
| 5   | 0.20            | 8.0                       | 4.0                        | 0.10             | 2.5                  |

Table S5 Experimental parameters in the optimization of cross-linking agent type

| No. | Template (mmol) | Functional monomer (mmol) | Cross-linking agent (mmol) |      | Initiator (mmol) | Porogen (mL)         |
|-----|-----------------|---------------------------|----------------------------|------|------------------|----------------------|
|     | PHT             | MMA                       | EGDMA                      | TRIM | AIBN             | ACN-DMF (1:1.5, v/v) |
| 1   | 0.20            | 6.0                       | 4.0                        | -    | 0.10             | 2.5                  |
| 2   | 0.20            | 6.0                       | -                          | 4.0  | 0.10             | 2.5                  |

Table S6 Experimental parameters in the optimization of cross-linking agent amount

| No. | Template (mmol) | Functional monomer (mmol) | Cross-linking agent (mmol) | Initiator (mmol) | Porogen (mL)         |
|-----|-----------------|---------------------------|----------------------------|------------------|----------------------|
|     | PHT             | MMA                       | EGDMA                      | AIBN             | ACN-DMF (1:1.5, v/v) |
| 1   | 0.20            | 6.0                       | 2.0                        | 0.10             | 2.5                  |
| 2   | 0.20            | 6.0                       | 3.0                        | 0.10             | 2.5                  |
| 3   | 0.20            | 6.0                       | 4.0                        | 0.10             | 2.5                  |
| 4   | 0.20            | 6.0                       | 5.0                        | 0.10             | 2.5                  |
| 5   | 0.20            | 6.0                       | 6.0                        | 0.10             | 2.5                  |

Table S7 Experimental parameters in the optimization of initiator amount

| No. | Template (mmol) | Functional monomer (mmol) | Cross-linking agent (mmol) | Initiator (mmol) | Porogen (mL)         |
|-----|-----------------|---------------------------|----------------------------|------------------|----------------------|
|     | PHT             | MMA                       | EGDMA                      | AIBN             | ACN-DMF (1:1.5, v/v) |
| 1   | 0.20            | 6.0                       | 4.0                        | 0.050            | 2.5                  |
| 2   | 0.20            | 6.0                       | 4.0                        | 0.075            | 2.5                  |
| 3   | 0.20            | 6.0                       | 4.0                        | 0.10             | 2.5                  |
| 4   | 0.20            | 6.0                       | 4.0                        | 0.15             | 2.5                  |
| 5   | 0.20            | 6.0                       | 4.0                        | 0.20             | 2.5                  |

Table S8 Experimental parameters in the optimization of porogen type

| No. | Template (mmol) | Functional monomer (mmol) | Cross-linking agent (mmol) | Initiator (mmol) | Porogen (mL) |               |     |       |     |
|-----|-----------------|---------------------------|----------------------------|------------------|--------------|---------------|-----|-------|-----|
|     |                 |                           |                            |                  | ACN          | ACN-DMF (v/v) |     |       |     |
|     | PHT             | MMA                       | EGDMA                      | AIBN             |              | 1.5:1         | 1:1 | 1:1.5 | 1:2 |
| 1   | 0.20            | 6.0                       | 4.0                        | 0.10             | 2.5          | -             | -   | -     | -   |
| 2   | 0.20            | 6.0                       | 4.0                        | 0.10             | -            | 2.5           | -   | -     | -   |
| 3   | 0.20            | 6.0                       | 4.0                        | 0.10             | -            | -             | 2.5 | -     | -   |
| 4   | 0.20            | 6.0                       | 4.0                        | 0.10             | -            | -             | -   | 2.5   | -   |
| 5   | 0.20            | 6.0                       | 4.0                        | 0.10             | -            | -             | -   | -     | 2.5 |

Table S9 Experimental parameters in the optimization of supporting membrane type

| No. | Membrane | Template (mmol) | Functional monomer (mmol) | Cross-linking agent (mmol) | Initiator (mmol) | Porogen (mL)         |
|-----|----------|-----------------|---------------------------|----------------------------|------------------|----------------------|
|     |          | PHT             | MMA                       | EGDMA                      | AIBN             | ACN-DMF (1:1.5, v/v) |
| 1   | PVDF     | 0.20            | 6.0                       | 4.0                        | 0.10             | 2.5                  |
| 2   | PP       | 0.20            | 6.0                       | 4.0                        | 0.10             | 2.5                  |
| 3   | PTFE     | 0.20            | 6.0                       | 4.0                        | 0.10             | 2.5                  |
| 4   | NY-66    | 0.20            | 6.0                       | 4.0                        | 0.10             | 2.5                  |

PVDF, polyvinylidene difluoride; PP, polypropylene; PTFE, polytetrafluoroethylene, NY-66, nylon 66

Table S10 Reproducibility experiment of PHT-MIPMs preparation (n = 3)

|       | Adsorption capacity of PHT (mg·g <sup>-1</sup> ) |      |      | Mean ± SD   | RSD (%) |
|-------|--------------------------------------------------|------|------|-------------|---------|
|       | 1                                                | 2    | 3    |             |         |
| 1     | 2.32                                             | 2.41 | 2.34 | 2.36 ± 0.05 | 0.02    |
| 2     | 2.40                                             | 2.25 | 2.44 | 2.36 ± 0.10 | 0.04    |
| 3     | 2.51                                             | 2.48 | 2.35 | 2.45 ± 0.08 | 0.03    |
| 4     | 2.34                                             | 2.49 | 2.34 | 2.39 ± 0.08 | 0.03    |
| 5     | 2.38                                             | 2.39 | 2.22 | 2.33 ± 0.10 | 0.04    |
| Total |                                                  |      |      | 2.38 ± 0.08 | 3.48    |

Table S11 Effect of dilution using phosphate buffer solution on the extraction recovery of MIPMs in plasma (n=5)

| Analyte | Nominal concentration (μg·mL <sup>-1</sup> ) | Recovery (%)        |         |                     |         |                     |         |
|---------|----------------------------------------------|---------------------|---------|---------------------|---------|---------------------|---------|
|         |                                              | Dilution ratio of 2 |         | Dilution ratio of 4 |         | Dilution ratio of 8 |         |
|         |                                              | Mean ± SD           | RSD (%) | Mean ± SD           | RSD (%) | Mean ± SD           | RSD (%) |
| PHT     | 42.08                                        | 77.28 ± 0.81***     | 1.05    | 89.54 ± 1.16        | 1.30    | 90.44 ± 1.03        | 1.13    |
| PHB     | 39.37                                        | 53.01 ± 1.23***     | 2.31    | 83.01 ± 0.89        | 1.07    | 83.58 ± 0.73        | 0.88    |
| LTG     | 63.60                                        | 40.25 ± 0.68***     | 1.69    | 68.86 ± 0.26        | 0.38    | 68.86 ± 0.33        | 0.48    |

\**P* < 0.05, \*\**P* < 0.01, or \*\*\**P* < 0.001 vs Dilution ratio of 4

Table S12 Extraction recovery of PHT and PHB in plasma treated by ACN protein precipitation or MIPMs (n=5)

| Analyte | Nominal concentration (μg·mL <sup>-1</sup> ) | Recovery (%)              |         |                  |         |
|---------|----------------------------------------------|---------------------------|---------|------------------|---------|
|         |                                              | ACN protein precipitation |         | MIPMs extraction |         |
|         |                                              | Mean ± SD                 | RSD (%) | Mean ± SD        | RSD (%) |
| PHT     | 3.16                                         | 83.04 ± 3.87              | 4.67    | 92.85 ± 0.50***  | 0.54    |
|         | 12.63                                        | 82.03 ± 0.84              | 1.03    | 87.64 ± 3.63**   | 4.14    |
|         | 42.08                                        | 82.44 ± 1.18              | 1.43    | 88.47 ± 3.23**   | 3.65    |
| PHB     | 2.95                                         | 82.27 ± 1.89              | 2.30    | 81.92 ± 2.20     | 2.68    |
|         | 11.81                                        | 81.12 ± 1.26              | 1.55    | 82.60 ± 1.65     | 2.00    |
|         | 39.37                                        | 80.80 ± 0.96              | 1.18    | 81.94 ± 1.57     | 1.92    |

\**P* < 0.05, \*\**P* < 0.01, or \*\*\**P* < 0.001 vs ACN protein precipitation

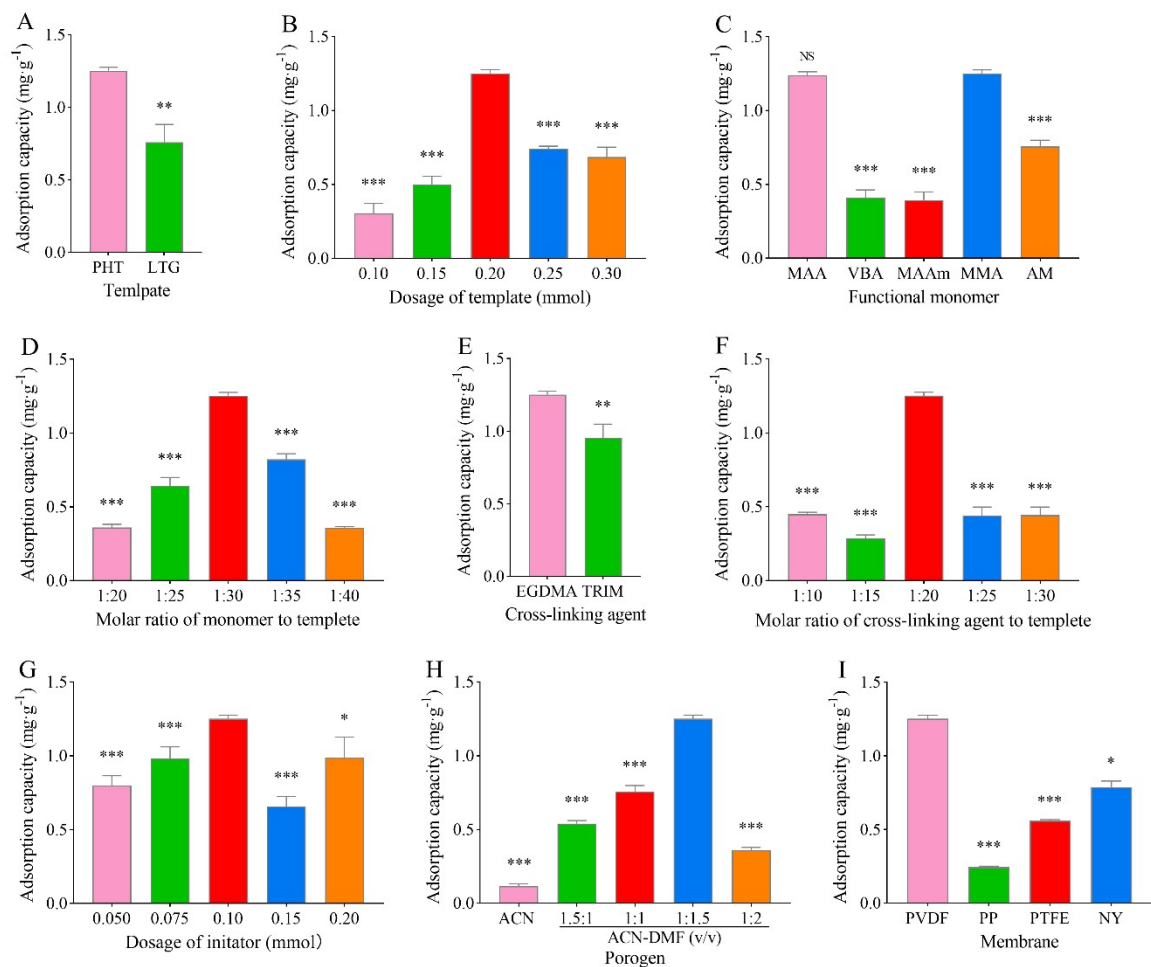

Figure S1 Influences of the types and amounts of template (A, B), functional monomer (C, D), cross-linking agent (E, F), initiator (G), porogen (H), and membrane (I) on the adsorption capacity of PHT-MIPMs (n=5). \* $p < 0.05$ , \*\* $p < 0.01$ , or no significant difference (NS) vs. PHT (A), template of 0.25 mmol (B), MMA (C), molar ratio of 1:30 (D), EGDMA (E), molar ratio of 1:20 (F), initiator of 0.10 mmol (G), ACN-DMF (1:1.5, v/v) (H), or PVDF (I).

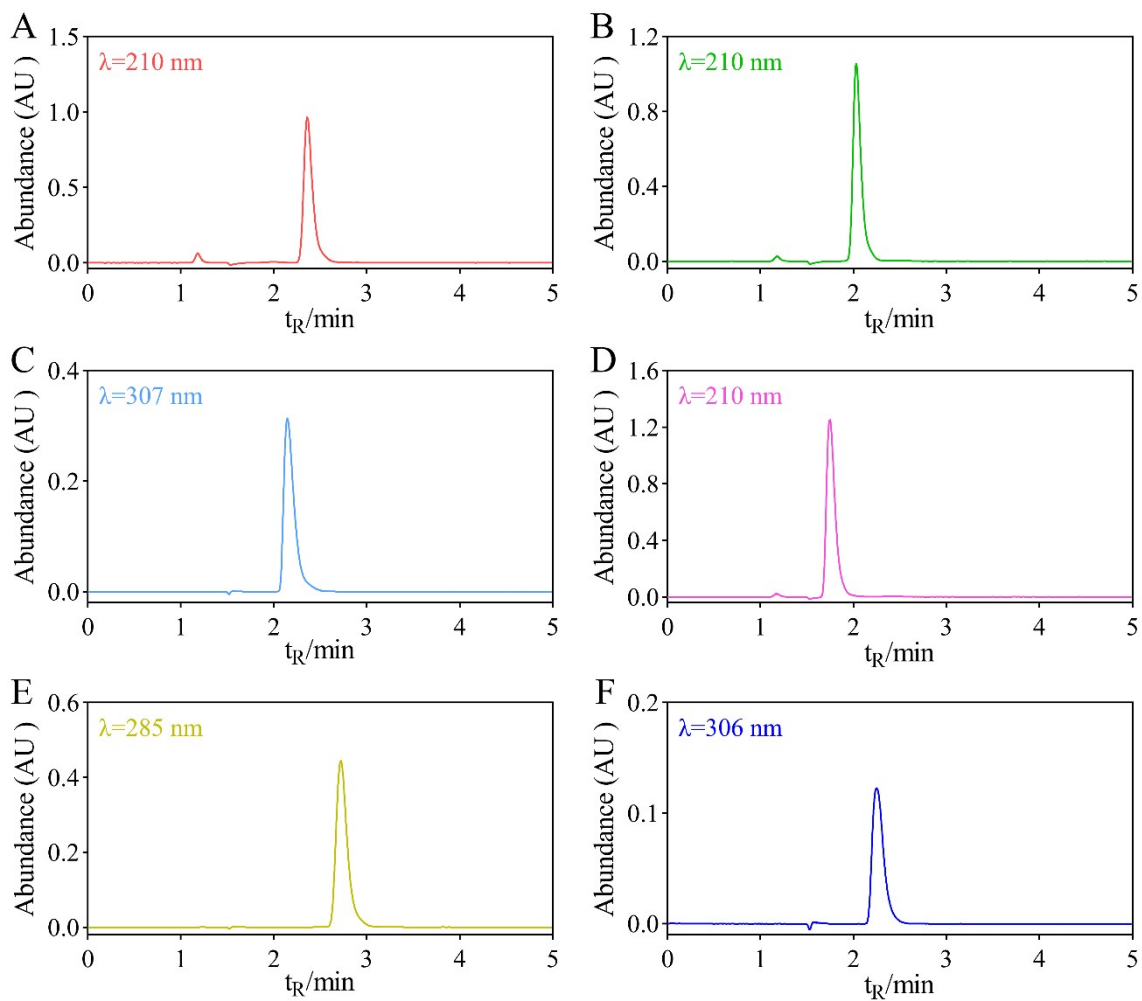

Fig. S2 Representative chromatograms of PHT (A), PHB (B), LTG (C), DPG (D), OXC (E), and CBZ (F).

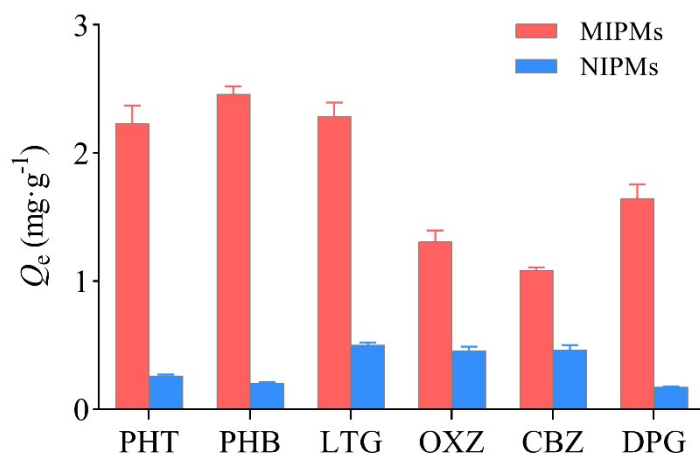

Fig. S3 Adsorption selectivity plots of MIPMs and NIPMs towards on PHT, PHT, LTG, DPG, OXC, and CBZ.  $n = 3$ .

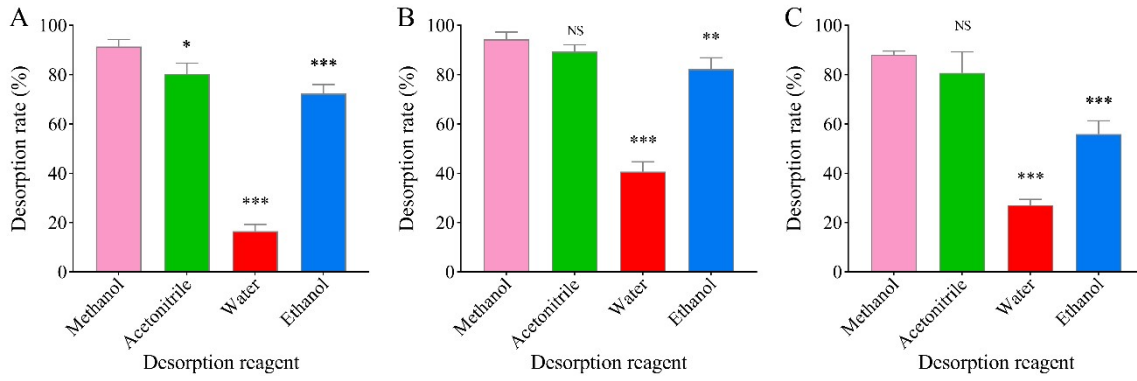

Fig. S4 Influences of different types of desorption reagent on the desorption rate of PHT (A), PHB (B) and LTG (C) adsorbed by MIPMs. \* $P < 0.05$ , \*\* $P < 0.01$ , \*\*\* $P < 0.001$  vs MeOH; NS means no significance;  $n = 3$ .

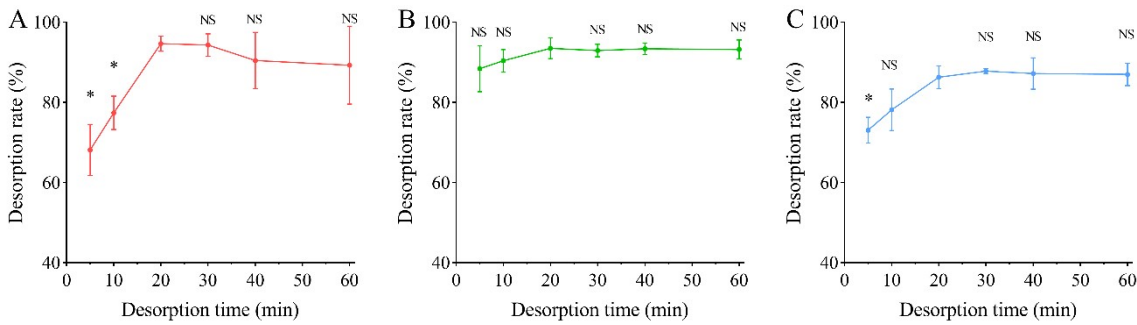

Fig. S5 Influences of different desorption time on the desorption rate of PHT (A), PHB (B) and LTG (C) adsorbed by PHT-MIPMs. \* $P < 0.05$  vs desorption time of 20 min; NS means no significance;  $n = 3$ .

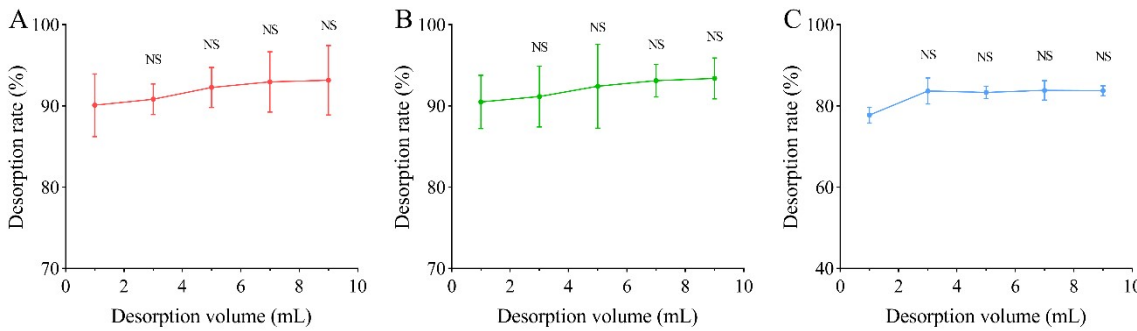

Fig. S6 Influences of different volumes of desorption reagent on the desorption rate of PHT (A), PHB (B) and LTG (C) adsorbed by PHT-MIPMs. NS means no significance by comparing with desorption volume of 1 mL;  $n = 3$ .

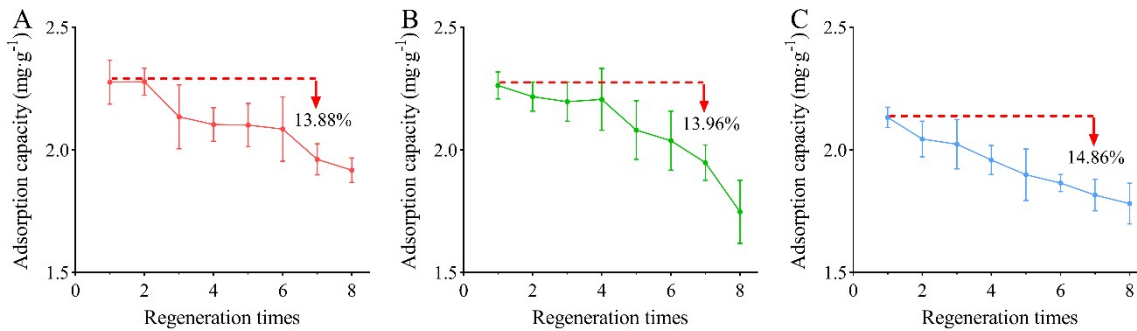

Fig. S7 Reusability of MIPMs towards PHT (A), PHB (B), and LTG (C).  $n = 3$ .

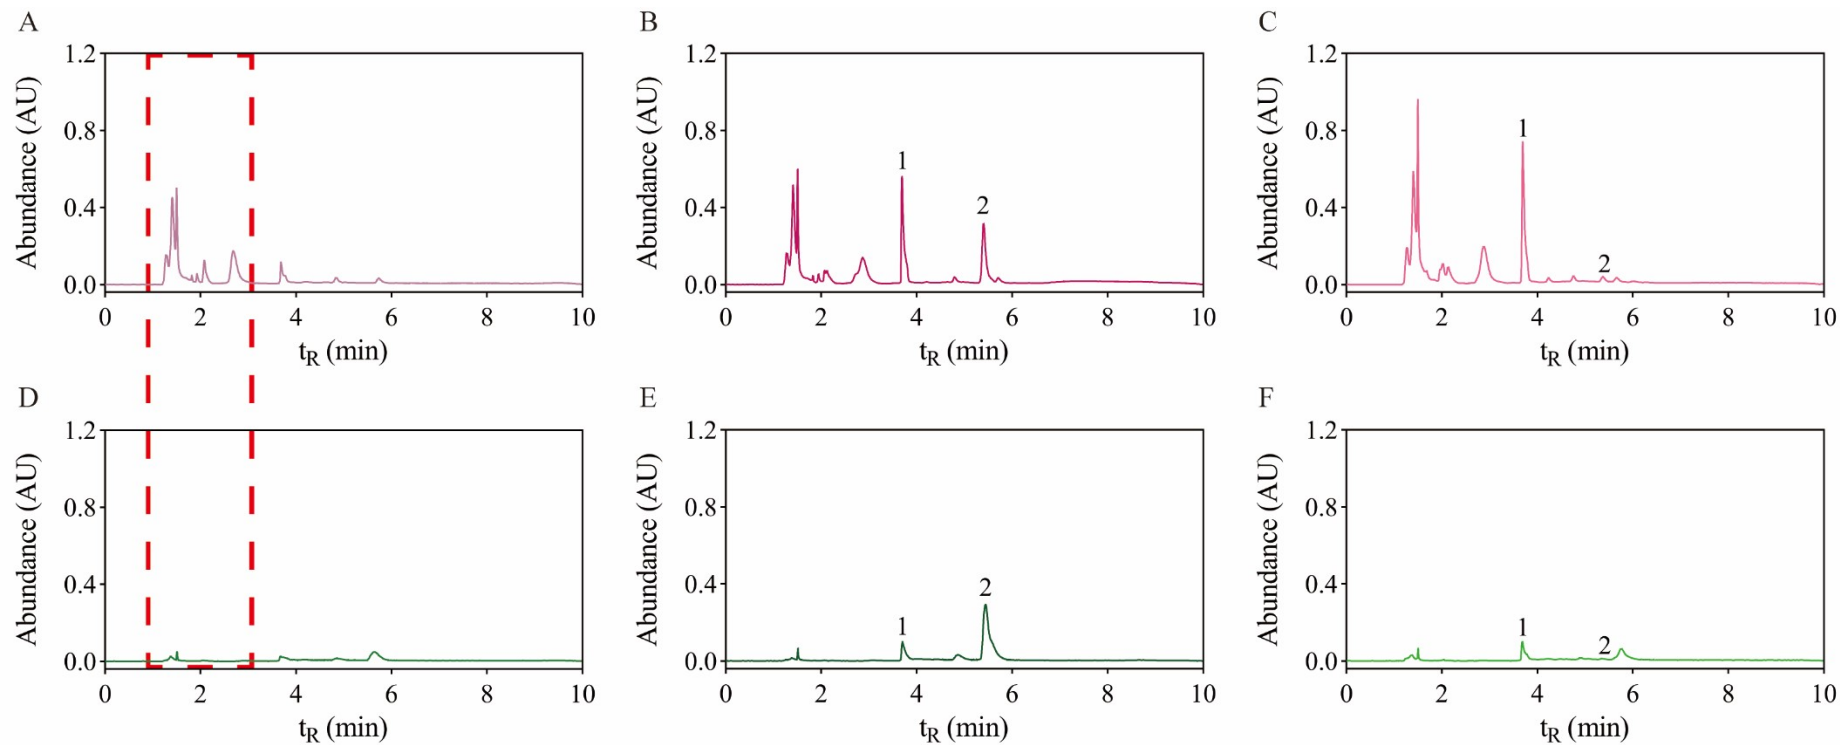

Fig. S8 Representative chromatogram of blank plasma, blank plasma spiked with reference standards and real rat plasma at 4.0 h after oral administration of 20 mg/kg PHT plus IS treated with ACN (A, B, C) or MIPMs (D, E, F). 1, IS, DPG; 2, PHT.

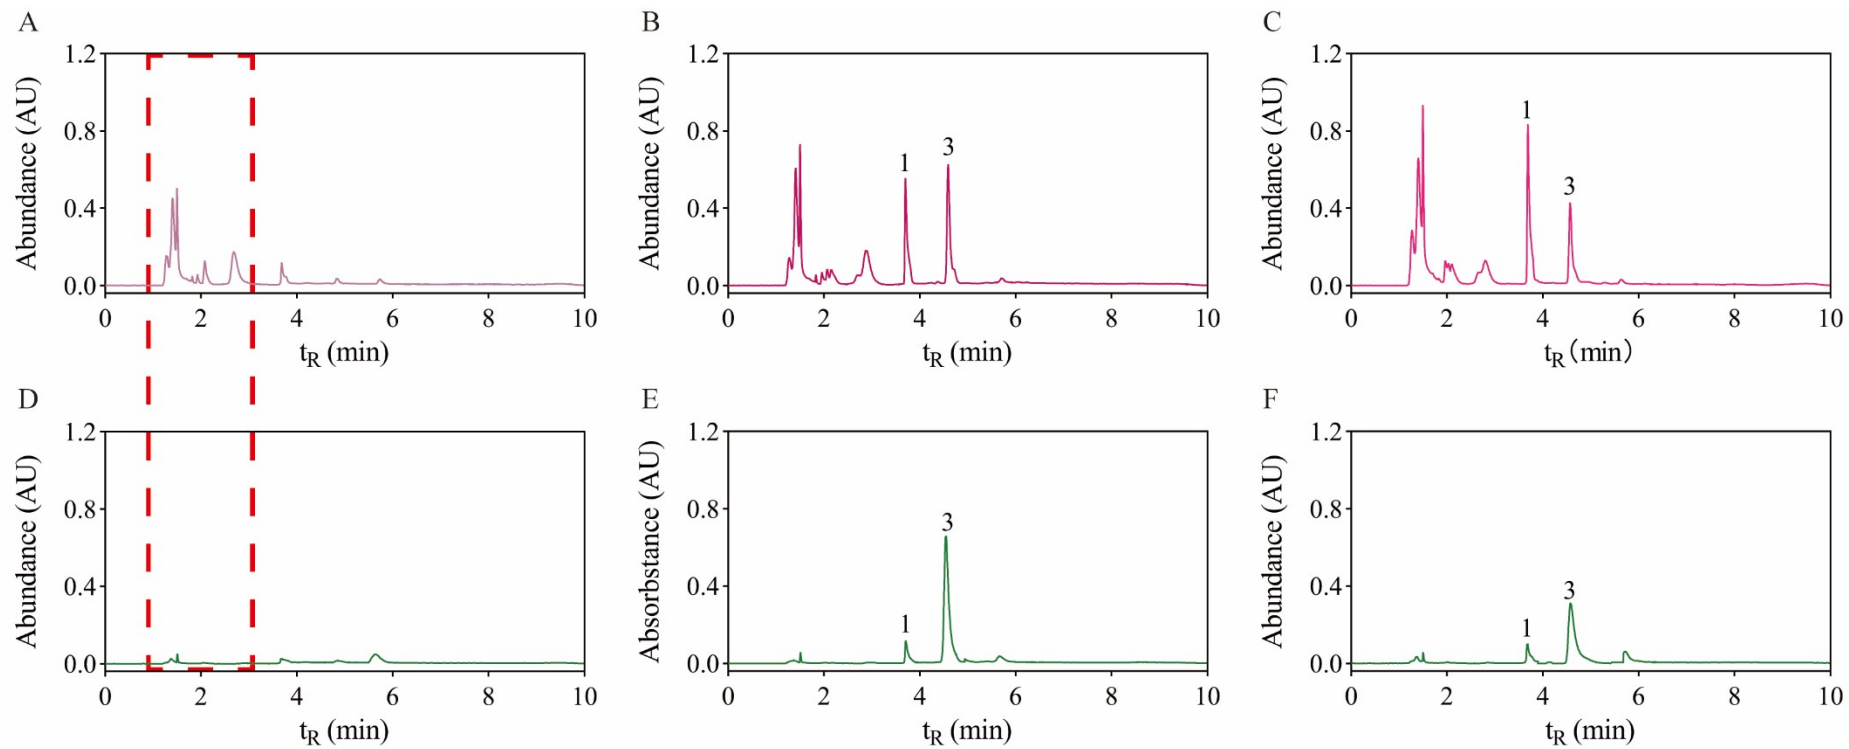

Fig. S9 Representative chromatogram of blank plasma, blank plasma spiked with reference standards and real rat plasma at 2.0 h after oral administration of 20 mg/kg PHB plus IS treated with ACN (A, B, C) or MIPMs (D, E, F). 1, IS, DPG; 3, PHB.
